# Supplementary material for: Electronic structure engineering of single atomic Ru by Ru nanoparticles to enable enhanced activity for alkaline water reduction
Source: Royal Society of Chemistry journal article supplement (doi:10.1039/c9ta06244k), 2019-01-01
Supplement: c9ta06244k1.pdf [file c9ta06244k1.pdf]

## Supporting Information

Electronic structures engineering of single atomic Ru by  
Ru nanoparticles to enable enhanced activity for alkaline  
water reduction

*Qi Hu<sup>#</sup>, Guomin Li<sup>#</sup>, Xiaowan Huang, Ziyu Wang, Hengpan Yang, Qianling Zhang,  
Jianhong Liu, Chuanxin He\**

College of Chemistry and Environmental Engineering, Shenzhen University,  
Shenzhen, Guangdong, 518060, People's Republic of China.

\*To whom correspondence should be addressed. Email: [hecx@szu.edu.cn](mailto:hecx@szu.edu.cn) (C. He)

**Table S1** Chemical compositions of PC determined by Elemental analysis

| Samples | Weight (wt%) |     |     |     |
|---------|--------------|-----|-----|-----|
|         | C            | N   | O   | H   |
| PC      | 91.5         | 1.1 | 2.8 | 1.0 |

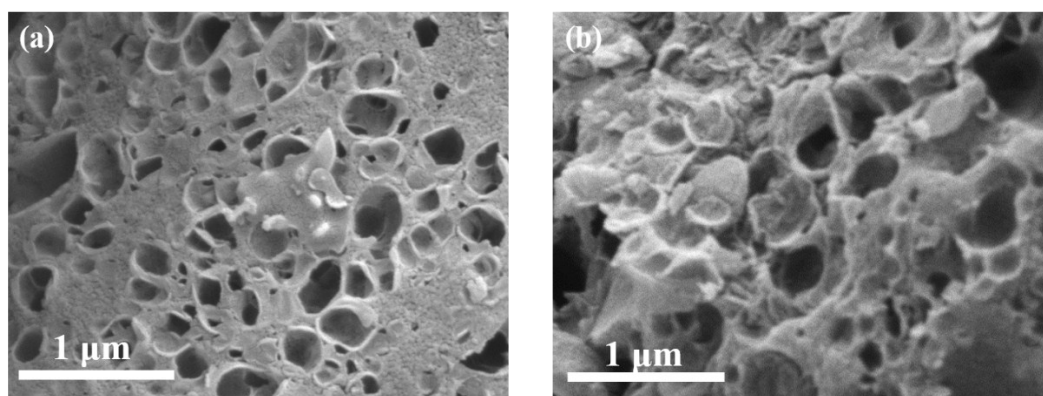

**Figure S1** SEM images of the porous N-doped carbon (denoted PC) derived from litchi pericarps.

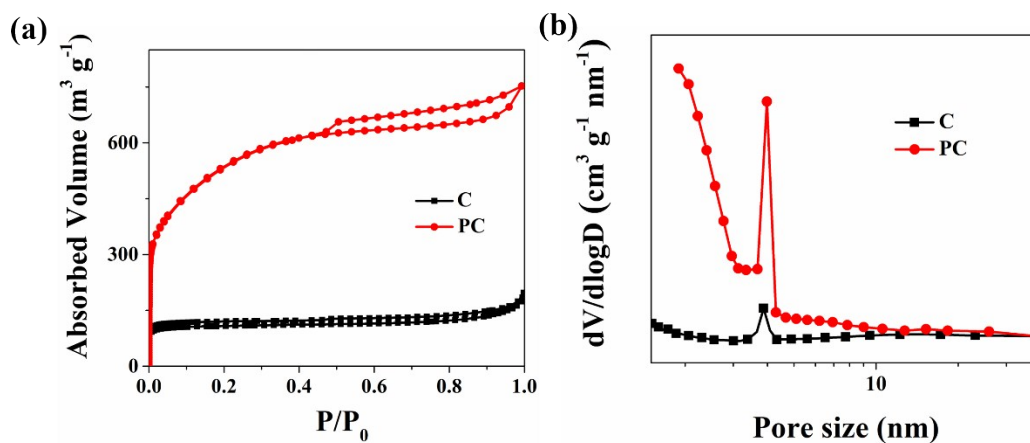

**Figure S2** (a)  $N_2$  adsorption-desorption isotherms of C (without hierarchical porous nanostructures) and PC (with hierarchical porous nanostructures), (b) corresponding pore distribution of above two samples based on a method of Barrett-Joyner-Halenda (BJH).

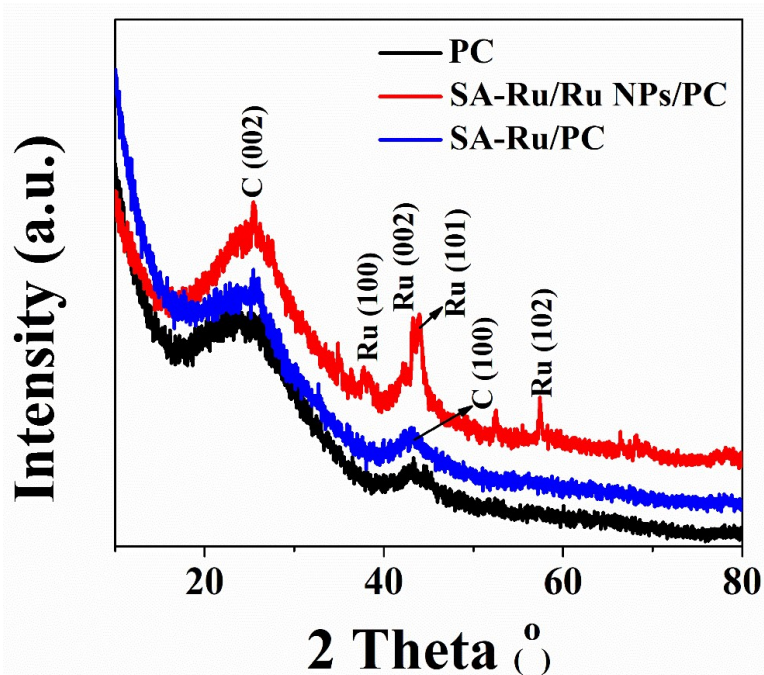

**Figure S3** XRD patterns of PC (without SA-Ru or Ru NPs), SA-Ru/Ru NPs/PC (with both SA-Ru and Ru NPs), and SA-Ru/PC (with only SA-Ru).

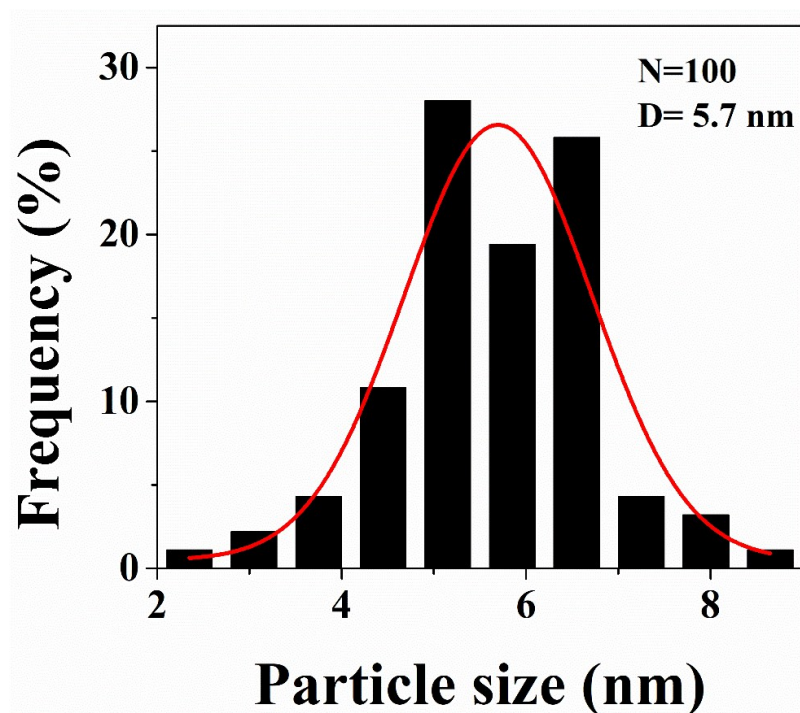

**Figure S4** Size distribution of Ru nanoparticles (NPs) on the SA-Ru/Ru NPs/PC.

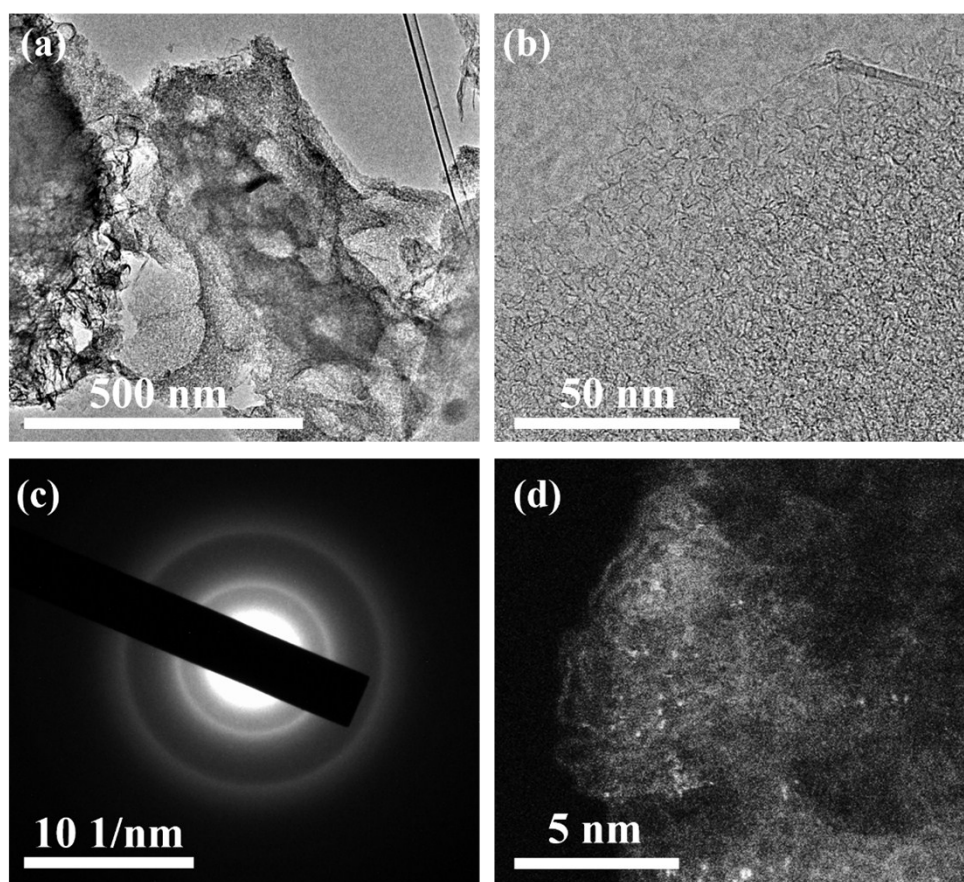

**Figure S5** (a, b) TEM image of SA-Ru/PC (without Ru NPs but with SA-Ru), (c) select-area electron diffraction (SAED) images of SA-Ru/PC, (d) STEM-HAADF images of SA-Ru/PC.

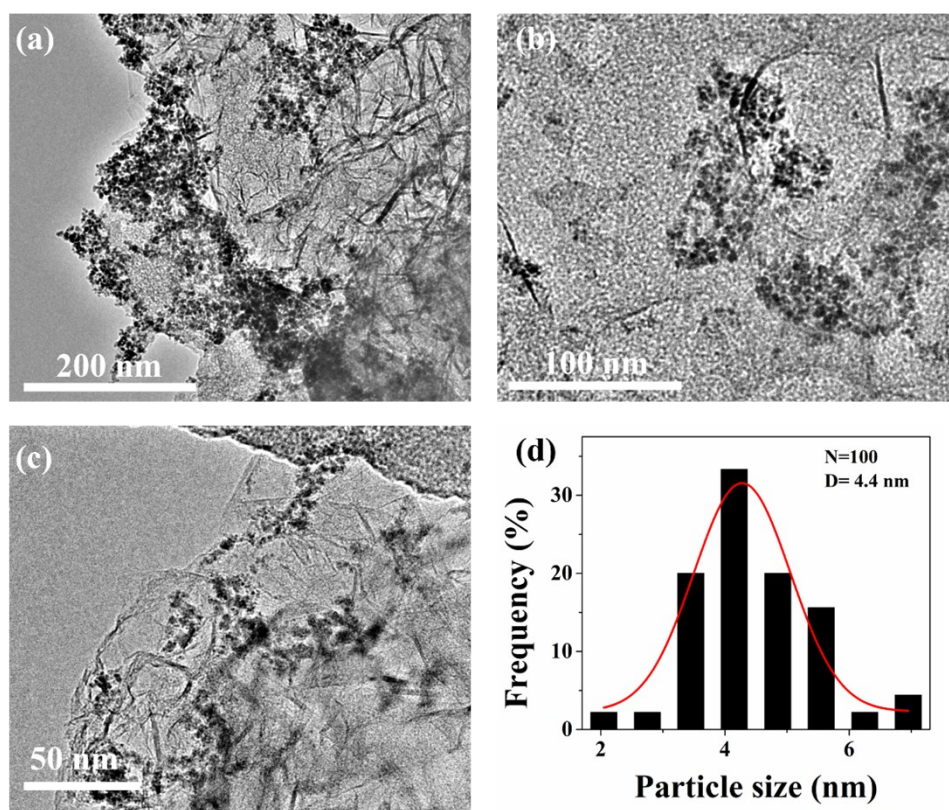

**Figure S6** (a, b, c) TEM images of Ru NPs/PC (without SA-Ru but with Ru NPs), (d) size distribution of Ru NPs on the Ru NPs/PC.

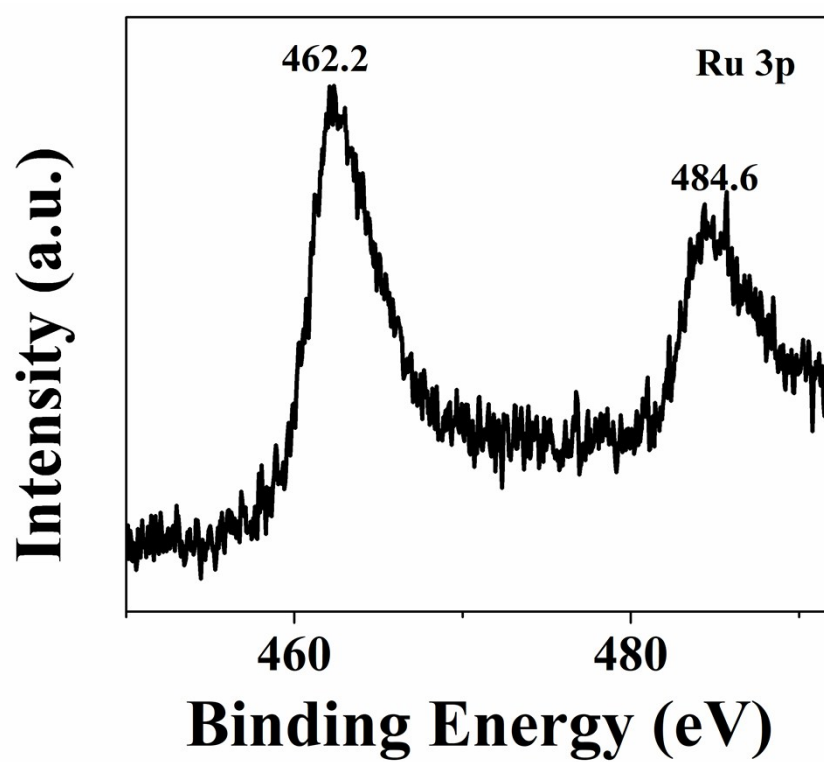

**Figure S7** Ru 3p XPS spectra of Ru NPs/PC.



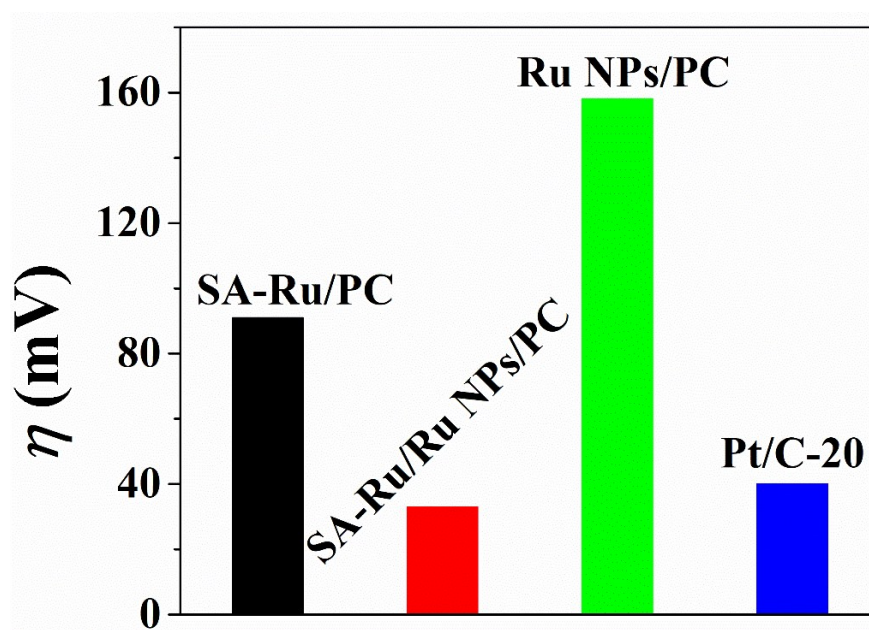

**Figure S8** Overpotentials of SA-Ru/PC, SA-Ru/Ru NPs/PC, Ru NPs/PC, and Pt/C-20 at the current density of 10 mA cm<sup>-2</sup>.



**Table S2 Comparison of HER activity with recent reported literatures**

| Electrocatalysts                                | Mass loading<br>(mg cm <sup>-2</sup> ) | Current<br>density<br>(mA cm <sup>-2</sup> ) | Overpotential<br>at certain <i>j</i><br>(mV) | Tafel slope<br>(mV dec <sup>-1</sup> ) | Reference |
|-------------------------------------------------|----------------------------------------|----------------------------------------------|----------------------------------------------|----------------------------------------|-----------|
| SA-Ru/Ru<br>NPs/PC (2.4<br>wt%)                 | 0.4<br>(Ru: 9.6 μg cm <sup>-2</sup> )  | 10<br>20<br>100                              | 33.0<br>45.0<br>65.1                         | 31.8                                   | This work |
| Ru/C <sub>3</sub> N <sub>4</sub> /C<br>(20 wt%) | 0.2<br>(Ru: 40 μg cm <sup>-2</sup> )   | 10                                           | 79                                           | N/A                                    | 1         |
| Ru@C <sub>2</sub> N<br>(28.7 wt%)               | 0.285<br>(Ru: 82 μg cm <sup>-2</sup> ) | 10<br>20                                     | 17<br>35.5                                   | 38                                     | 2         |
| RuCo@NC                                         | 0.275                                  | 10<br>100                                    | 28<br>218                                    | 31                                     | 3         |
| Ru@NC<br>(2 wt%)                                | 0.3<br>(Ru: 6 μg cm <sup>-2</sup> )    | 10<br>20<br>100                              | 26<br>40<br>98                               | 36                                     | 4         |
| Ru-NC-700<br>nanowires                          | 0.2                                    | 10                                           | 12                                           | 14                                     | 5         |
| Porous Ru<br>nanomaterials                      | 0.36<br>(Ru: 360 μg cm <sup>-2</sup> ) | 10                                           | 83                                           | 80                                     | 6         |
| RuP <sub>2</sub> @NPC                           | 1.0                                    | 10                                           | 52                                           | 69                                     | 7         |
| Ni <sub>1.5</sub> Co <sub>1.4</sub> P@Ru        | 0.25                                   | 10<br>50                                     | 52<br>105                                    | 50                                     | 8         |

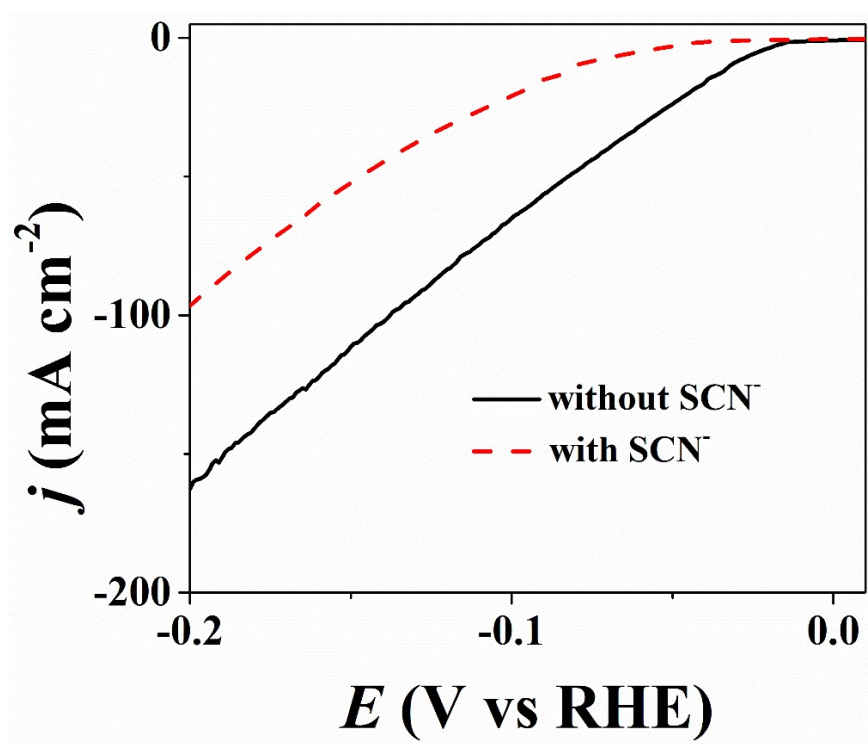

**Figure S9** LSV curves of SA-Ru/Ru NPs/PC with and without addition of 10 mM SCN<sup>-</sup> to electrolyte

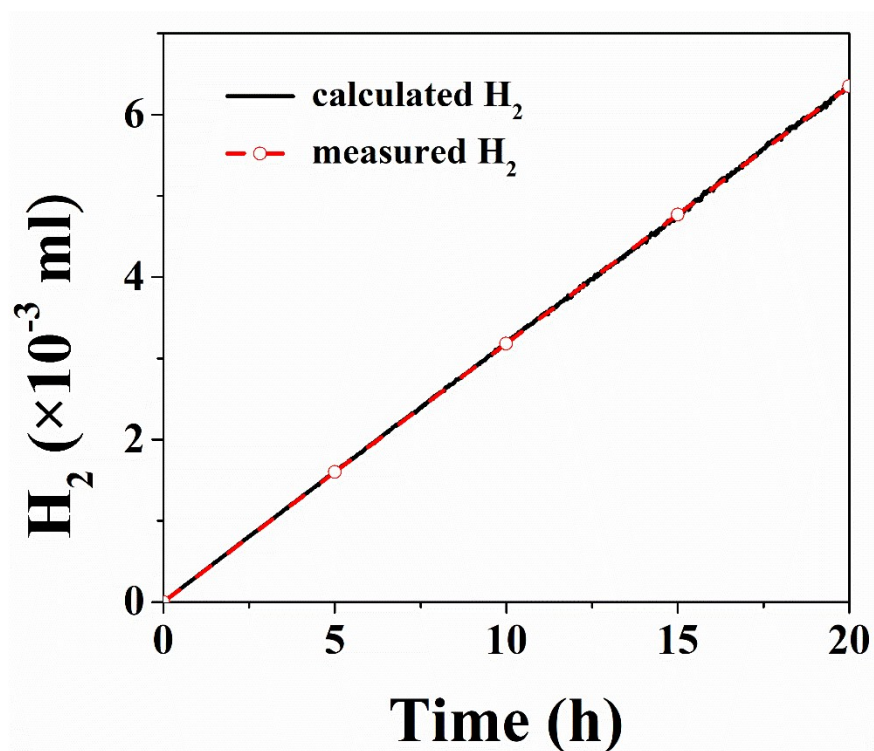

**Figure S10** Hydrogen amount theoretically calculated and experimentally measured versus time for SA-Ru/Ru NPs/PC at the potential of -0.07 V vs RHE.

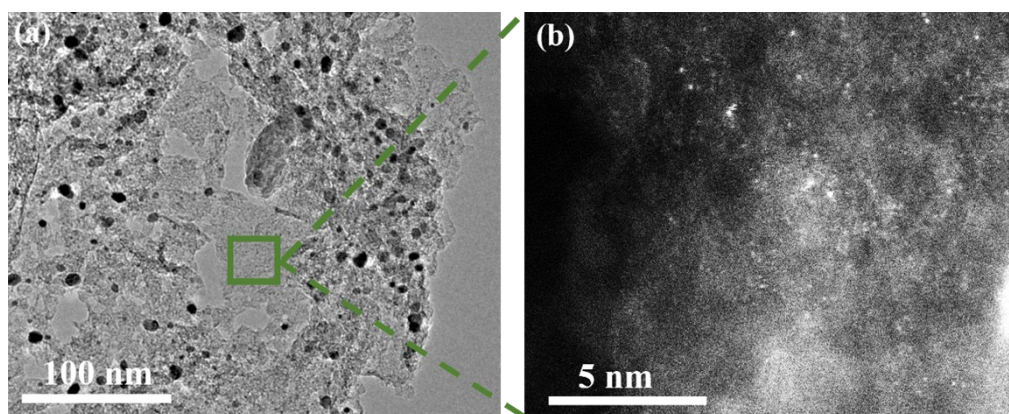

**Figure S11** TEM and HADDF-STEM images of SA-Ru/Ru NPs/PC after stability test of 24 h.

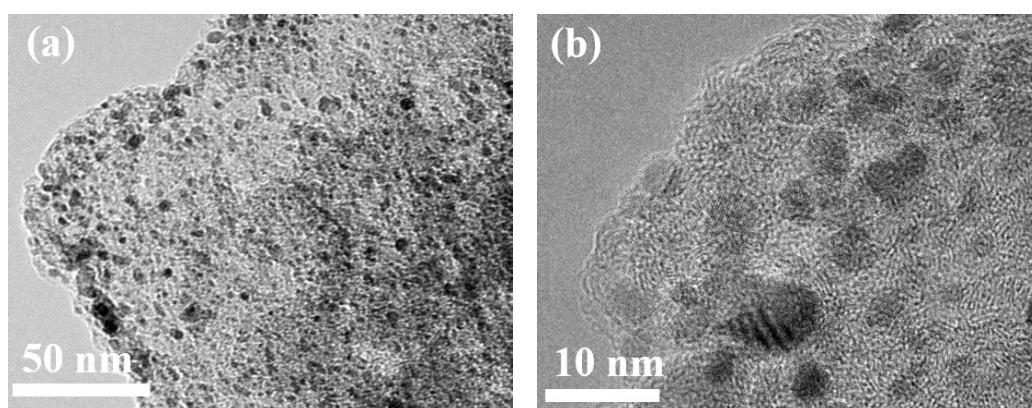

**Figure S12** TEM images of SA-Ru/Ru NPs/PC (without hierarchical porous nanostructures).

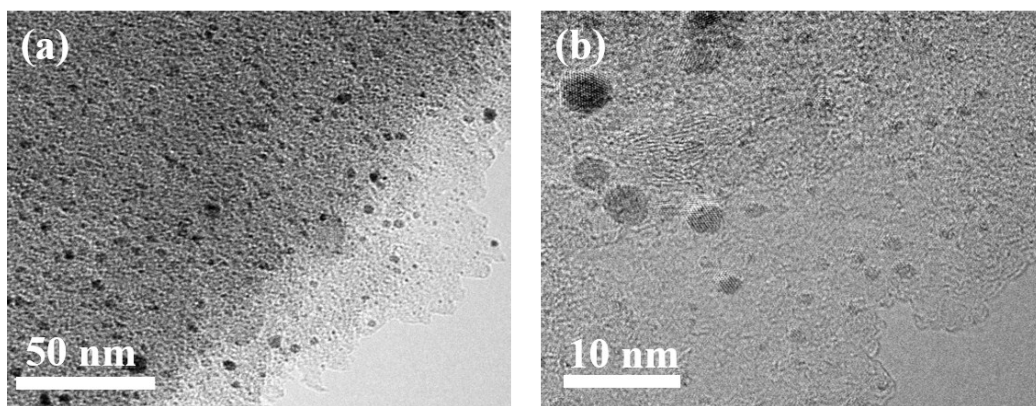

**Figure S13** TEM images of Ru/GO (supported on the graphene oxide)

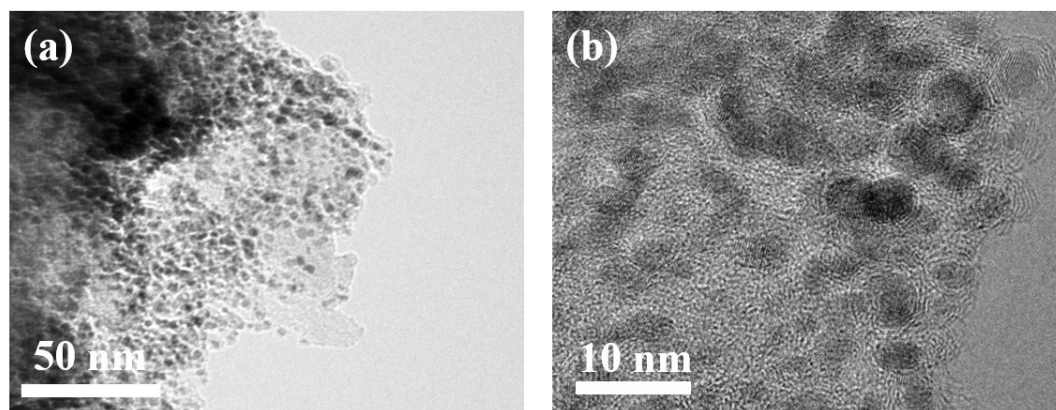

**Figure S14** TEM images of Ru/C<sub>3</sub>N<sub>4</sub> (supported on the carbon nitride).

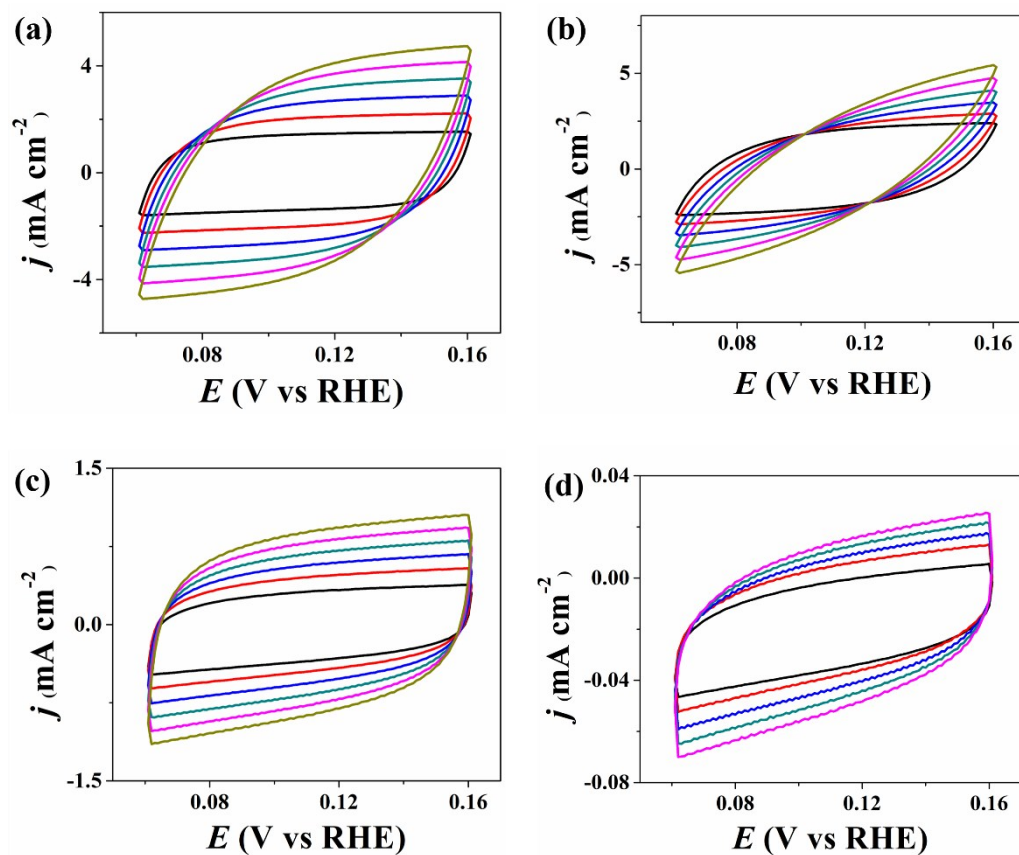

**Figure S15** CV curves for (a) SA-Ru/Ru NPs/PC, (b) SA-Ru/Ru NPs/C, (c) Ru/GO, and (d) Ru/C<sub>3</sub>N<sub>4</sub> at different rates (i.e. 0.04, 0.06, 0.08, 0.10, 0.12, and 0.14 V/s)



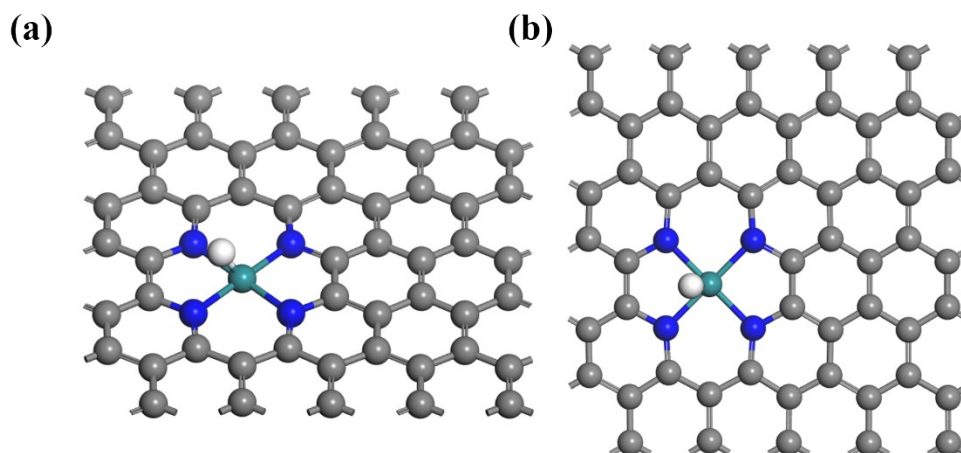

**Figure S16** (a) Side and (b) top view of the configuration for H\* intermediates absorbed on RuN4. Gray atoms, blue atoms, cyan atoms, and white atoms, represent C, N, Ru, and H elements.

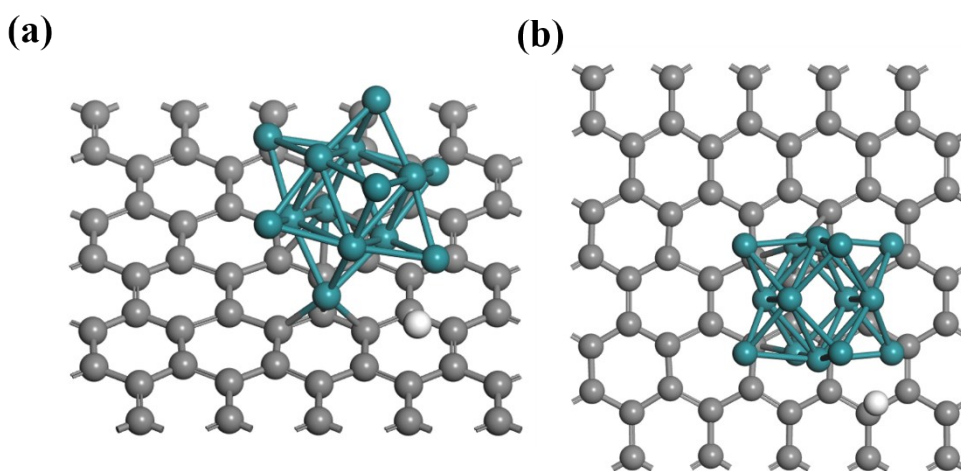

**Figure S17** (a) Side and (b) top view of the configuration for H\* intermediates absorbed on Ru NPs. Gray atoms, blue atoms, cyan atoms, and white atoms, represent C, N, Ru, and H elements.



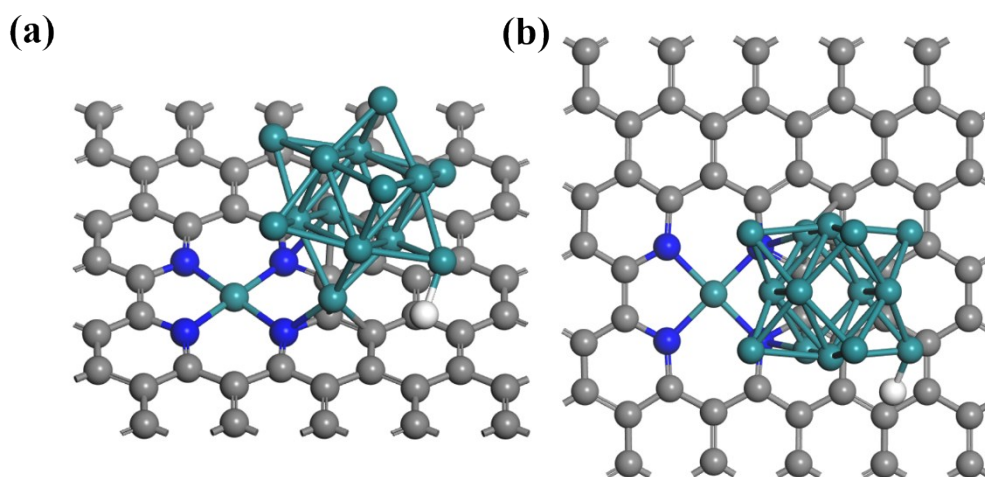

**Figure S18** (a) Side and (b) top view of the configuration for H\* intermediates absorbed on RuN<sub>4</sub>/Ru NPs. Gray atoms, blue atoms, cyan atoms, and white atoms, represent C, N, Ru, and H elements.

## Reference

- 1 Zheng, Y., Jiao, Y., Zhu, Y., Li, L. H., Han, Y., Chen, Y., Jaroniec, M., Qiao, S. -Z. High Electrocatalytic Hydrogen Evolution Activity of an Anomalous Ruthenium Catalyst. *J. Am. Chem. Soc.* **2016**, *138*, 16174–16181.
- 2 Mahmood, J., Li, F., Jung, S. -M., Okay, M. S., Ahmad, I., Kim, S. -J., Park, N., Jeong, H. Y., Baek, J. -B. An efficient and pH-universal ruthenium-based catalyst for the hydrogen evolution reaction. *Nat. Nanotech.* **2017**, *12*, 441–446.
- 3 Su, J., Yang, Y., Xia, G., Chen, J., Jiang, P., Chen, Q. Ruthenium-cobalt nanoalloys encapsulated in nitrogen-doped graphene as active electrocatalysts for producing hydrogen in alkaline media. *Nat. Commun.* **2017**, *8*, 14969.

- 4 Wang, Z. -L., Sun, K., Henzie, J., Hao, X., Li, C., Takei, T., Kang, Y. -M., Yamauchi, Y. Spatially Confined Assembly of Monodisperse Ruthenium Nanoclusters in a Hierarchically Ordered Carbon Electrode for Efficient Hydrogen Evolution. *Angew. Chem. Int. Edit.* **2018**, *57*, 5848–5852.
- 5 Lu, B., Guo, L., Wu, F., Peng, Y., Lu, J. E., Smart, T. J. Wang, N., Finprock, Y. Z., Morris, D., Zhang, P., Li, N., Gao, P., Ping, Y., Chen, S. Ruthenium atomically dispersed in carbon outperforms platinum toward hydrogen evolution in alkaline media. *Nat. Commun.* **2019**, *10*, 631.
- 6 Drouet, S., Creus, J., Amiens, C., García-Antón, J., Sala, X., Philippot, K. A porous Ru nanomaterial as an efficient electrocatalyst for the hydrogen evolution reaction under acidic and neutral conditions. *Chem. Commun.* **2017**, *53*, 11713–11716.
- 7 Pu, Z., Amiin, I. S., Kou, Z., Li, W., Mu, S. RuP<sub>2</sub>-Based Catalysts with Platinum-like Activity and Higher Durability for the Hydrogen Evolution Reaction at All pH Values. *Angew. Chem. Int. Edit.* 2017, **129**, 11717–11722.
- 8 Liu, S., Liu, Q., Lv, Y., Chen, B., Zhou, Q., Wang, L., Zheng, Q., Che, C., Chen, C. Ru decorated with NiCoP: an efficient and durable hydrogen evolution reaction electrocatalyst in both acidic and alkaline conditions. *Chem. Commun.* 2017, **53**, 13153–13156.
